# Supplementary material
Source: publisher figshare collection journal article supplement (https://acs.figshare.com/ndownloader/files/4864306)
Supplement: Supplementary file 1 [file 4864306]

## Support Information

### Synthesis and Biological Evaluation of a Novel Sigma-1 Receptor ligands for Treating Neuropathic Pain: 6-hydroxy-2-phenylpyridazinones

Xudong Cao,<sup>a§</sup> Yin Chen,<sup>b§</sup> Yifang Zhang,<sup>a</sup> Yu Lan,<sup>a</sup> Juecheng Zhang,<sup>a</sup> Xiangqing Xu,<sup>b</sup> Yinli Qiu,<sup>b</sup> Song Zhao,<sup>b</sup> Xin Liu,<sup>a</sup> Bi-Feng Liu,<sup>a</sup> and Guisen Zhang<sup>a,b,\*</sup>

<sup>a</sup> *Systems Biology Theme, Department of Biomedical Engineering, College of Life Science and Technology, Huazhong University of Science and Technology,*

*Wuhan 430074, China*

<sup>b</sup> *Jiangsu Nhwa Pharmaceutical Co., Ltd. 69 Democratic South Road, Xuzhou, Jiangsu 221116, China*

§ These authors contributed equally to this work;

\* Author to whom correspondence should be addressed;

E-Mail: gszhang@mail.hust.edu.cn; Tel.: +86-27-87792235; Fax: +86-27-87792170.

#### Table of Contents:

1. Inhibition Curves Figure of Functional Profile of  $\sigma_1$  Receptor s2-s3
2. Selectivity of Compound **54** for Additional Receptors and Ion Channels s4-s13
3. The data of compound **54** in Phase I (0-15 min) of the mice formalin test s14
4. <sup>1</sup>H NMR, HR-MS and HPLC of Compound **54** s15-s17
5. X-Ray Crystal Data of Compound **54** s18-s24
6. References s25-s26

## Inhibition Curves Figure of Functional Profile of $\sigma_1$ Receptor

**Table 1.** Ratio of  $K_i$  values without or with phenytoin

|                    | Ratio $K_i$<br>without / with phenytoin* |
|--------------------|------------------------------------------|
| (+) SKF 10047      | 2.82                                     |
| S1RA               | 0.65                                     |
| Compound <b>54</b> | 0.73                                     |

\*: The concentration of phenytoin was 1mM

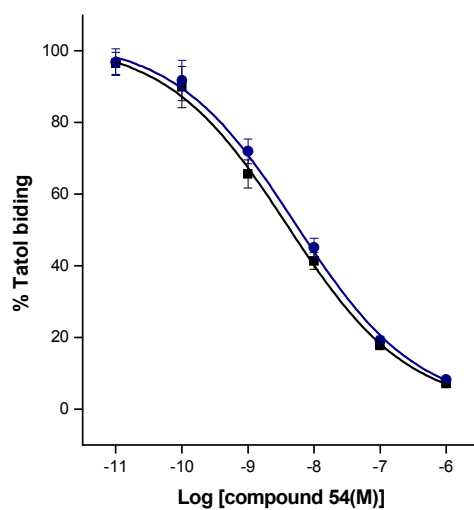

**Figure 1.** Inhibition of compound **54** with increasing concentrations of ligands (■) and the inhibition in the presence of 1mM phenytoin (●)

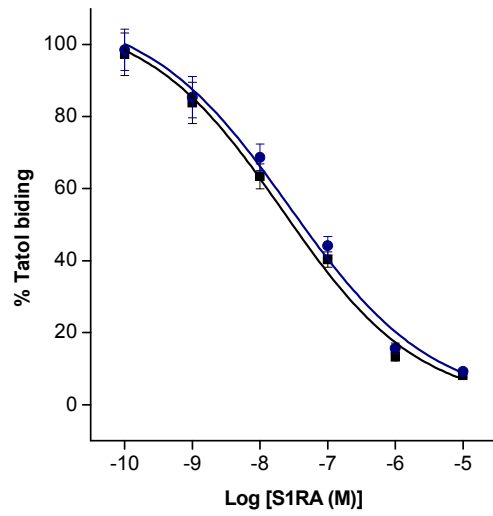

**Figure 2.** Inhibition of compound S1RA with increasing concentrations of ligands (■) and the inhibition in the presence of 1mM phenytoin (●)

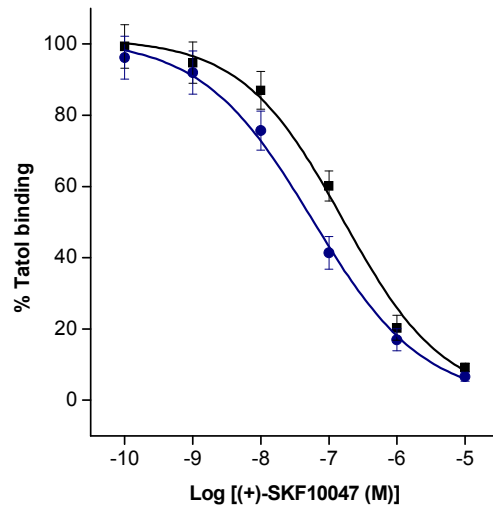

**Figure 3.** Inhibition of compound (+)-SKF-10047 with increasing concentrations of ligands (■) and the inhibition in the presence of 1mM phenytoin (●)

## Selectivity of Compound 54 for Additional Receptors and Ion Channels

### Selectivity of compound 54 for additional receptors

#### *In vitro* binding assay

*General procedures:* All of the new compounds were dissolved in 5% DMSO. Blank experiments were carried out to determine the effect of 5% DMSO on the binding and no effects were observed. Compounds were tested at least three times over 1  $\mu$ M. The following specific radioligands and tissue sources were used: (1) Serotonin 5-HT<sub>1A</sub> receptor, [<sup>3</sup>H]-8-OH-DPAT (187.4 Ci/mmol, Perkin-Elmer), and rat cerebral cortex; (2) Serotonin 5-HT<sub>2A</sub> receptor, [<sup>3</sup>H]-ketanserin (60.0 Ci/mmol, Perkin-Elmer), and rat cerebral cortex; (3) Serotonin 5-HT transporter, [<sup>3</sup>H]-paroxetine (22.9 Ci/mmol; Perkin-Elmer), and rat cerebral cortex; (4) Noradrenaline transporter, [*N*-methyl-<sup>3</sup>H]-nisoxetine (25.0 Ci/mmol; Perkin-Elmer), and rat hippocampal membrane; (5) Histamine H<sub>1</sub> receptor, [<sup>3</sup>H]-mepyramine (20.0 Ci/mmol; Perkin-Elmer), and guinea pig cerebellum; (6) Histamine H<sub>3</sub> receptor, [<sup>3</sup>H]-*N*- $\alpha$ -methylhistamine (50.0 Ci/mmol; Perkin-Elmer), and rat cerebral cortex; (7) Adrenergic  $\alpha_1$  receptor, [<sup>3</sup>H]-prazosin (85.4 Ci/mmol; Perkin-Elmer), and rat cerebral cortex; (8) Adrenergic  $\alpha_2$  receptor, [<sup>3</sup>H]-rauwolscine (73.0 Ci/mmol; Perkin-Elmer), and rat cerebral cortex; (9) NMDA receptor, [<sup>3</sup>H]-glycine (60.0 Ci/mmol; Perkin-Elmer), and rat hippocampal membrane; (10)  $\mu$ -opioid receptor, [<sup>3</sup>H]-diprenorphine (45.0 Ci/mmol; Perkin-Elmer), and human  $\mu$ -opioid receptor-expressing CHO cells. (11) Cannabinoid CB<sub>1</sub> receptor, [<sup>3</sup>H]-CP-55940 (148 Ci/mmol; Perkin-Elmer), and human CB<sub>1</sub> receptor-expressing CHO cells. (12) Cannabinoid CB<sub>2</sub> receptor, [<sup>3</sup>H]-CP-55940 (148 Ci/mmol; Perkin-Elmer), and human CB<sub>2</sub> receptor-expressing HEK cells.

*Serotonin 5-HT<sub>1A</sub> receptor.*<sup>1</sup> Rat cerebral cortex was homogenized in 20 volumes of ice-cold Tris-HCl buffer (50 mM, pH 7.7) using an ULTRA TURAX homogenizer, and was then centrifuged at 32000 g for 10 min. The resulting pellet was then resuspended in the same buffer, incubated for 10 min at 37 °C, and centrifuged at 32000 g for 10 min. The final pellet was resuspended in Tris-HCl buffer containing 10  $\mu$ M Pargyline, 4 mM CaCl<sub>2</sub>, and 0.1% ascorbic acid. For total binding, to each

assay tube was added 900  $\mu\text{L}$  of the tissue suspension, 50  $\mu\text{L}$  of 0.5 nM [ $^3\text{H}$ ]-8-OH-DPAT, 50  $\mu\text{L}$  of Tris-HCl buffer containing 10  $\mu\text{M}$  pargyline, 4 mM  $\text{CaCl}_2$ , and 0.1% ascorbic acid. For nonspecific binding, to each assay tube was added 900  $\mu\text{L}$  of the tissue suspension, 50  $\mu\text{L}$  of 0.5 nM [ $^3\text{H}$ ]-8-OH-DPAT, and 50  $\mu\text{L}$  of 10  $\mu\text{M}$  serotonin. For specific binding, to each assay tube was added 900  $\mu\text{L}$  of the tissue suspension, 50  $\mu\text{L}$  of 0.5 nM [ $^3\text{H}$ ]-8-OH-DPAT, 50  $\mu\text{L}$  of 1  $\mu\text{M}$  compound. The tubes were incubated at 37  $^\circ\text{C}$  for 30 min. The incubation was followed by a rapid vacuum filtration through Whatman GF/B glass filters, and the filtrates were washed twice with 5 mL of cold buffer and transferred to scintillation vials. Scintillation fluid (3.0 mL) was added, and the radioactivity bound was measured using a Beckman LS 6500 liquid scintillation counter.

*Serotonin 5-HT<sub>2A</sub> receptor.*<sup>1</sup> Rat cerebral cortex was homogenized in 20 volumes of ice-cold Tris-HCl buffer (50 mM, pH 7.7) using an ULTRA TURAX homogenizer, and centrifuged at 32000g for 20 min. The resulting pellet was resuspended in the same quantity of the buffer centrifuged for 20 min. The final pellet was resuspended in 50 volumes of the Tris-HCl buffer. For total binding, to each assay tube was added 900  $\mu\text{L}$  of the tissue suspension, 50  $\mu\text{L}$  of 0.6 nM [ $^3\text{H}$ ]-ketanserin, and 50  $\mu\text{L}$  Tris-HCl buffer. For nonspecific binding, to each assay tube was added 900  $\mu\text{L}$  of the tissue suspension, 50  $\mu\text{L}$  of 0.6 nM [ $^3\text{H}$ ]-ketanserin, and 50  $\mu\text{L}$  of 10  $\mu\text{M}$  methysergide. For specific binding, to each assay tube was added 900  $\mu\text{L}$  of the tissue suspension, 50  $\mu\text{L}$  of 0.6 nM [ $^3\text{H}$ ]-ketanserin, 50  $\mu\text{L}$  of 1  $\mu\text{M}$  compound. The tubes were incubated at 37  $^\circ\text{C}$  for 15 min. The incubation was followed by rapid vacuum filtration through Whatman GF/B glass filters, and the filtrates were washed twice with 5 mL of cold buffer and transferred to scintillation vials. Scintillation fluid (3.0 mL) was added, and the radioactivity bound was measured using a Beckman LS 6500 liquid scintillation counter.

*Serotonin 5-HT transporter.*<sup>2-3</sup> Rat cerebral cortex was homogenized in 20 volumes of ice-cold Tris-HCl buffer (50 mM, pH 7.7) containing 150 mM NaCl and 5mM KCl, using an ULTRA TURAX homogenizer, and centrifuged at 20000 g for 20 min. The resulting pellet was resuspended in the same quantity of the buffer centrifuged for 20

min. The final pellet was resuspended in 50 volumes of the Tris-HCl buffer. For total binding, to each assay tube was added 900  $\mu\text{L}$  of the tissue suspension, 50  $\mu\text{L}$  of 1 nM [ $^3\text{H}$ ]-paroxetine, and 50  $\mu\text{L}$  Tris-HCl buffer. For nonspecific binding, to each assay tube was added 900  $\mu\text{L}$  of the tissue suspension, 50  $\mu\text{L}$  of 1 nM [ $^3\text{H}$ ]-paroxetine, and 50  $\mu\text{L}$  of 10  $\mu\text{M}$  paroxetine. For specific binding, to each assay tube was added 900  $\mu\text{L}$  of the tissue suspension, 50  $\mu\text{L}$  of 0.6 nM [ $^3\text{H}$ ]-paroxetine, 50  $\mu\text{L}$  of 1  $\mu\text{M}$  compound. The tubes were incubated at 37  $^\circ\text{C}$  for 10 min. The incubation was followed by rapid vacuum filtration through Whatman GF/B glass filters, and the filtrates were washed twice with 5 mL of cold buffer and transferred to scintillation vials. Scintillation fluid (3.0 mL) was added, and the radioactivity bound was measured using a Beckman LS 6500 liquid scintillation counter.

*Noradrenaline transporter.*<sup>3-4</sup> Rat hippocampal membrane was homogenized in 20 volumes of ice-cold 50 mM phosphate buffer (pH 7.4) using an ULTRA TURAX homogenizer, and centrifuged twice for 10 min at 35,000g with resuspension of the pellet in fresh buffer. The final pellet was resuspended in membrane buffer (20 mM HEPES, 145 mM NaCl, 5 mM KCl, pH 7.4). For total binding, to each assay tube was added 900  $\mu\text{L}$  of membranes, 50  $\mu\text{L}$  of 1 nM *N*-methyl- [ $^3\text{H}$ ]-nisoxetine, and 50  $\mu\text{L}$  of membrane buffer. For nonspecific binding, to each assay tube was added 900  $\mu\text{L}$  of membranes, 50  $\mu\text{L}$  of 1 nM *N*-methyl- [ $^3\text{H}$ ]-nisoxetine, and 50  $\mu\text{L}$  of 1  $\mu\text{M}$  desipramine. For specific binding, to each assay tube was added 900  $\mu\text{L}$  of membranes, 50  $\mu\text{L}$  of 1 nM *N*-methyl- [ $^3\text{H}$ ]-nisoxetine, 50  $\mu\text{L}$  of 1  $\mu\text{M}$  compound. The tubes were incubated at 30 $^\circ\text{C}$  for 8h. The incubation was followed by rapid vacuum filtration through Whatman GF/B glass filters, and the filtrates were washed twice with 5 mL of cold buffer and transferred to scintillation vials. Scintillation fluid (3.0 mL) was added, and the radioactivity bound was measured using a Beckman LS 6500 liquid scintillation counter.

*Histamine H<sub>1</sub> receptor.*<sup>1</sup> Guinea pig cerebellum was homogenized in 20 volumes of ice-cold 50 mM phosphate buffer (pH 7.4) using an ULTRA TURAX homogenizer, and centrifuged twice for 10 min at 50,000g with resuspension of the pellet in fresh buffer. The final pellet was resuspended in phosphate buffer. For total binding, to

each assay tube was added 900  $\mu\text{L}$  of membranes, 50  $\mu\text{L}$  of 1 nM [ $^3\text{H}$ ]-mepyramine, and 50  $\mu\text{L}$  of phosphate buffer. For nonspecific binding, to each assay tube was added 900  $\mu\text{L}$  of membranes, 50  $\mu\text{L}$  of 1 nM [ $^3\text{H}$ ]-mepyramine, and 50  $\mu\text{L}$  of 10  $\mu\text{M}$  promethazine. For specific binding, to each assay tube was added 900  $\mu\text{L}$  of membranes, 50  $\mu\text{L}$  of 1 nM [ $^3\text{H}$ ]-mepyramine, 50  $\mu\text{L}$  of 1  $\mu\text{M}$  compound. The tubes were incubated at 30  $^\circ\text{C}$  for 60 min. The incubation was followed by rapid vacuum filtration through Whatman GF/B glass filters, and the filtrates were washed twice with 5 mL of cold buffer and transferred to scintillation vials. Scintillation fluid (3.0 mL) was added, and the radioactivity bound was measured using a Beckman LS 6500 liquid scintillation counter.

*Histamine  $H_3$  receptor.*<sup>5</sup> Rat cerebral cortex was homogenized in 20 volumes of ice-cold membrane buffer (5 mM Tris-HCl, pH 7.5; 5 mM EDTA and protease inhibitor) using an ULTRA TURAX homogenizer, and centrifuged at 40000g for 30 min at 4  $^\circ\text{C}$ . The resulting membrane pellets were washed by resuspension in membrane buffer (50 mM Tris-HCl, pH 7.5; 0.6 mM EDTA, 5 mM  $\text{MgCl}_2$  and protease inhibitors) and centrifuged for 20 min. The final pellet was resuspended in 50 volumes of the Tris-HCl buffer. For total binding, to each assay tube was added 900  $\mu\text{L}$  of the tissue suspension, 50  $\mu\text{L}$  of 1 nM [ $^3\text{H}$ ]-N- $\alpha$ -methylhistamine, and 50  $\mu\text{L}$  of membrane buffer. For nonspecific binding, to each assay tube was added 900  $\mu\text{L}$  of the tissue suspension, 50  $\mu\text{L}$  of 1 nM [ $^3\text{H}$ ]-N- $\alpha$ -methylhistamine, and 50  $\mu\text{L}$  of 10  $\mu\text{M}$  thioperamide. For specific binding, to each assay tube was added 900  $\mu\text{L}$  of the tissue suspension, 50  $\mu\text{L}$  of 1 nM [ $^3\text{H}$ ]-N- $\alpha$ -methylhistamine, 50  $\mu\text{L}$  of 1  $\mu\text{M}$  compound. The tubes were incubated at 25  $^\circ\text{C}$  for 30 min. The incubation was followed by rapid vacuum filtration through Whatman GF/B glass filters, and the filtrates were washed twice with 5 mL of cold buffer and transferred to scintillation vials. Scintillation fluid (3.0 mL) was added, and the radioactivity bound was measured using a Beckman LS 6500 liquid scintillation counter.

*Adrenergic  $\alpha_1$  receptor.*<sup>1</sup> Rat cerebral cortex was homogenized in 20 volumes of ice-cold Tris-HCl buffer containing 5 mM EDTA (50mM, pH 7.7) using an ULTRA TURAX homogenizer and centrifuged at 44000g for 20 min at 4  $^\circ\text{C}$ . The resulting

pellet was resuspended in the same quantity of the buffer centrifuged for 20 min. The final pellet was resuspended in 50 volumes of the Tris-HCl buffer. For total binding, to each assay tube was added 900  $\mu$ L of the tissue suspension, 50  $\mu$ L of 1 nM [ $^3$ H]-prazosin, and 50  $\mu$ L of Tris-HCl buffer. For nonspecific binding, to each assay tube was added 900  $\mu$ L of the tissue suspension, 50  $\mu$ L of 1 nM [ $^3$ H]-prazosin, and 50  $\mu$ L of 10  $\mu$ M prazosin. For specific binding, to each assay tube was added 900  $\mu$ L of the tissue suspension, 50  $\mu$ L of 1 nM [ $^3$ H]-prazosin, 50  $\mu$ L of 1  $\mu$ M compound. The tubes were incubated at 25  $^{\circ}$ C for 60 min. The incubation was followed by rapid vacuum filtration through Whatman GF/B glass filters, and the filtrates were washed twice with 5 mL of cold buffer and transferred to scintillation vials. Scintillation fluid (3.0 mL) was added, and the radioactivity bound was measured using a Beckman LS 6500 liquid scintillation counter.

*Adrenergic  $\alpha_2$  receptor.*<sup>1</sup> Rat cerebral cortex was homogenized in 20 volumes of ice-cold Tris-HCl buffer containing 5 mM EDTA (50 mM, pH 7.7) using an ULTRA TURAX homogenizer and centrifuged at 44000g for 20 min at 4  $^{\circ}$ C. The resulting pellet was resuspended in the same quantity of the buffer centrifuged for 20 min. The final pellet was resuspended in 50 volumes of the Tris-HCl buffer. For total binding, to each assay tube was added 900  $\mu$ L of the tissue suspension, 50  $\mu$ L of 1 nM [ $^3$ H]-rauwolscine, and 50  $\mu$ L of Tris-HCl buffer. For nonspecific binding, to each assay tube was added 900  $\mu$ L of the tissue suspension, 50  $\mu$ L of 1 nM [ $^3$ H]-rauwolscine, and 50  $\mu$ L of 10  $\mu$ M rauwolscine. For specific binding, to each assay tube was added 900  $\mu$ L of the tissue suspension, 50  $\mu$ L of 1 nM [ $^3$ H]-rauwolscine, 50  $\mu$ L of 1  $\mu$ M compound. The tubes were incubated at 25  $^{\circ}$ C for 60 min. The incubation was followed by rapid vacuum filtration through Whatman GF/B glass filters, and the filtrates were washed twice with 5 mL of cold buffer and transferred to scintillation vials. Scintillation fluid (3.0 mL) was added, and the radioactivity bound was measured using a Beckman LS 6500 liquid scintillation counter.

*NMDA receptor.*<sup>6</sup> Rat hippocampal membrane was homogenized in 20 volumes of ice-cold 50 mM phosphate buffer (pH 7.4) using an ULTRA TURAX homogenizer,



and centrifuged twice for 10 min at 50,000g with resuspension of the pellet in fresh buffer. The final pellet was resuspended in phosphate buffer. For total binding, to each assay tube was added 900  $\mu\text{L}$  of membranes, 50  $\mu\text{L}$  of 1 nM [ $^3\text{H}$ ]-glycine with 10  $\mu\text{M}$  glutamic acid, and 50  $\mu\text{L}$  of phosphate buffer. For nonspecific binding, to each assay tube was added 900  $\mu\text{L}$  of membranes, 50  $\mu\text{L}$  of 1 nM [ $^3\text{H}$ ]-glycine with 10  $\mu\text{M}$  glutamic acid, and 50  $\mu\text{L}$  of 1  $\mu\text{M}$  glycine. For specific binding, to each assay tube was added 900  $\mu\text{L}$  of membranes, 50  $\mu\text{L}$  of 1 nM [ $^3\text{H}$ ]-glycine with 10  $\mu\text{M}$  glutamic acid, 50  $\mu\text{L}$  of 1  $\mu\text{M}$  compound. The tubes were incubated at 30°C for 30 min. The incubation was followed by rapid vacuum filtration through Whatman GF/B glass filters, and the filtrates were washed twice with 5 mL of cold buffer and transferred to scintillation vials. Scintillation fluid (3.0 mL) was added, and the radioactivity bound was measured using a Beckman LS 6500 liquid scintillation counter.

*$\mu$ -opioid receptor.*<sup>7</sup> A suspension of membranes from human  $\mu$ -opioid receptor-expressing CHO cells in 50 mM Tris-HCl buffer (pH 7.4) containing 5 mM  $\text{MgCl}_2$  and 10% sucrose was used. For total binding, to each assay tube was added 900  $\mu\text{L}$  of the tissue suspension, 50  $\mu\text{L}$  of 0.33 nM [ $^3\text{H}$ ]-diprenorphine, and 50  $\mu\text{L}$  of Tris-HCl buffer. For nonspecific binding, to each assay tube was added 900  $\mu\text{L}$  of the tissue suspension, 50  $\mu\text{L}$  of 1 nM [ $^3\text{H}$ ]-diprenorphine, and 50  $\mu\text{L}$  of 10  $\mu\text{M}$  naloxone. For specific binding, to each assay tube was added 900  $\mu\text{L}$  of the suspension, 50  $\mu\text{L}$  of 0.33 nM [ $^3\text{H}$ ]-diprenorphine, 50  $\mu\text{L}$  of 1  $\mu\text{M}$  compound. The tubes were incubated at room temperature for 150 min. The incubation was followed by rapid vacuum filtration through Whatman GF/B glass filters, and the filtrates were washed twice with 5 mL of cold buffer and transferred to scintillation vials. Scintillation fluid (3.0 mL) was added, and the radioactivity bound was measured using a Beckman LS 6500 liquid scintillation counter.

*Cannabinoid  $\text{CB}_1$  receptor.*<sup>8-9</sup> Human  $\text{CB}_1$  receptor-expressing CHO cells were scraped in 10ml cold buffer (20mM HEPES, 10mM EDTA, pH 7.5), homogenized in an ULTRA TURAX homogenizer, and centrifuged twice for 10 min at 32,000g with resuspension of the pellet in fresh buffer. For total binding, to each assay tube was added 900  $\mu\text{L}$  of membranes, 50  $\mu\text{L}$  of 0.5 nM [ $^3\text{H}$ ]-CP-55940, and 50  $\mu\text{L}$  of buffer

(50mM Tris-HCl, 50 mM 2-amino-2-(hydroxymethyl)-1,3-propanediol 2.5mM EDTA, 5mM MgCl<sub>2</sub>, 0.05% fatty acid free BSA, pH 7.4). For nonspecific binding, to each assay tube was added 900 µL of membranes, 50 µL of 0.5 nM [<sup>3</sup>H]-CP-55940, and 50 µL of 10 µM CP-55940. For specific binding, to each assay tube was added 900 µL of membranes, 50 µL of 0.5 nM [<sup>3</sup>H]-CP-55940, 1 µM compound. The tubes were incubated at 30°C for 90 min. The incubation was followed by rapid vacuum filtration through Whatman GF/B glass filters, and the filtrates were washed twice with 5 mL of cold buffer and transferred to scintillation vials. Scintillation fluid (3.0 mL) was added, and the radioactivity bound was measured using a Beckman LS 6500 liquid scintillation counter.

*Cannabinoid CB<sub>2</sub> receptor.*<sup>8-9</sup> Human CB<sub>2</sub> receptor-expressing HEK cells were scraped in 10ml cold buffer (20mM HEPES, 10mM EDTA, pH 7.5), homogenized in an ULTRA TURAX homogenizer, and centrifuged twice for 15 min at 30,000g with resuspension of the pellet in fresh buffer. For total binding, to each assay tube was added 900 µL of membranes, 50 µL of 0.5 nM [<sup>3</sup>H]-CP-55940, and 50 µL of buffer (50mM Tris-HCl, 50 mM 2-amino-2-(hydroxymethyl)-1,3-propanediol 2.5mM EDTA, 5mM MgCl<sub>2</sub>, 0.05% fatty acid free BSA, pH 7.4). For nonspecific binding, to each assay tube was added 900 µL of membranes, 50 µL of 0.5 nM [<sup>3</sup>H]-CP-55940, and 50 µL of 10 µM CP-55940. For specific binding, to each assay tube was added 900 µL of membranes, 50 µL of 0.5 nM [<sup>3</sup>H]-CP-55940, 50 µL of 1 µM compound. The tubes were incubated at 30°C for 90 min. The incubation was followed by rapid vacuum filtration through Whatman GF/B glass filters, and the filtrates were washed twice with 5 mL of cold buffer and transferred to scintillation vials. Scintillation fluid (3.0 mL) was added, and the radioactivity bound was measured using a Beckman LS 6500 liquid scintillation counter.

### **Selectivity of compound 54 for ion channels**

#### **Voltage-gated sodium channel Nav 1.7**

The inhibitory activity of compound **54** to voltage-gated sodium channel Nav 1.7 was performed according to Macsari, I and *et al.*<sup>10</sup> by using human voltage-gated sodium channel Nav 1.7 expressing HEK293 cells, with some minor modifications.

*Solutions.* For Nav 1.7 recording, the extracellular Ringer's solution is composed of 140mM NaCl, 4mM KCl, 1mM MgCl<sub>2</sub>, 2mM CaCl<sub>2</sub>, 5mM D-Glucose monohydrate, 10mM HEPES, pH=7.4 with NaOH. For the DRG neuron measurement, 100mM CdCl<sub>2</sub> and 0.5μM TTX were involved to block the Ca<sup>2+</sup> currents and TTXs-Nav currents. The internal pipette solution contains 145mM CsCl, 0.1mM CaCl<sub>2</sub>, 2mM MgCl<sub>2</sub>, 10mM NaCl, 0.5mM Na<sub>2</sub>-GTP, 2mM Mg-ATP, 1.1mM EGTA, 10mM HEPES, pH 7.2 with CsOH.

*Cell culture.* Human voltage-gated sodium channel Nav 1.7 expressing HEK293 cells were cultured in DMEM medium supplemented with 10% FBS and 1.2mg/ml G418 in culture flasks. Cells grew in a humidified incubator at 37°C under 5% carbon dioxide. To maintain electrophysiological performances, cell density must not exceed 80%.

*Electrophysiological recordings.* To measure voltage-gated sodium channel Nav 1.7, the membrane potential was hold at -90mV, then depolarized to 0mV for 50ms to activate Nav1.7 currents. This voltage-clamp pulse protocol was performed during the experiment. An interpulse interval of 10 seconds allows recovery from inactivation.

The electrophysiological recordings were obtained under visual control under microscope (Olympus IX71, Japan). The amplifier (HEKA EPC10, Germany) was used for the recording of the electrophysiological signal. Offset potentials were nulled directly before formation of a seal. No leak subtraction was made. Cell (in pF) was made from whole-cell capacitance compensation. The data were stored and analyzed with Patchmaster software. All of the experiments were performed at room temperature. Fast perfusion system should be used to apply drugs directly to the cell in seconds. Each concentration was perfused over 5 minutes, or until the current reached a steady- state level. After the final concentration of reference agent tested, the reference compound should be washout out with extracellular solution for 5 minutes. The following criteria were used to determine data acceptability: (1) Access resistance ≤ 10 MΩ. (2) Membrane resistance ≥ 500 MΩ. (3) No apparent rundown for peak current.

Within each cellular recording, the current responses to test compound addition

were normalized to the vehicle control (Icompound / Ivehicle control) and the ratios of inhibition were calculated as following equation:

$$\% \text{ inhibition} = 1 - (\text{current response} / \text{maximal control tail current}) \times 100 \%$$

TRPV-1 protein

The inhibitory activity of compound **54** to TRPV-1 protein was performed according to M. Quintanar-Audelo and *et al.*<sup>11-12</sup> by using Human TRPV-1 protein expressing HEK293 cells, with some minor modifications.

*Solutions.* For whole cell patch clamp recordings, the external solution is composed of 140mM NaCl, 5mM KCl, 2mM MgCl<sub>2</sub>, 2mM CaCl<sub>2</sub>, 10mM HEPES, 5mM glucose, pH 7.4 with NaOH. The internal solution contains 140mM CsCl, 5mM CaCl<sub>2</sub>, 1mM Mg-ATP, 10mM HEPES, 10mM EGTA, 2mM MgCl<sub>2</sub>, pH 7.2 with CsOH. The [Ca<sup>2+</sup>]<sub>i</sub> was clamped to 85 nM (calculated with WebMaxC v2.1).

*Cell culture.* Human TRPV-1 protein expressing HEK293 cells were cultured in DMEM medium supplemented with 10% FBS and 1.2mg/ml G418 in culture flasks. Cells grew in a humidified incubator at 37°C under 5% carbon dioxide. To maintain electrophysiological performances, cell density must not exceed 80%.

*Electrophysiological recordings.* To measure TRPV-1 current, cells were held at 0 mV and repeated voltage commands stepping to -100 mV for 20 ms followed by a voltage ramp to 100 mV in 100 ms were given at a 1 sec interval.

The electrophysiological recordings were obtained under visual control under microscope (Olympus IX71, Japan). The amplifier (HEKA EPC10, Germany) was used for the recording of the electrophysiological signal. Offset potentials were nulled directly before formation of a seal. No leak subtraction was made. Cell (in pF) was made from whole-cell capacitance compensation. The data were stored and analyzed with Patchmaster software. All of the experiments were performed at room temperature. Fast perfusion system should be used to apply drugs directly to the cell in seconds. Each concentration was perfused over 5 minutes, or until the current reached a steady- state level. After the final concentration of reference agent tested, the reference compound should be washout out with extracellular solution for 5 minutes. The following criteria were used to determine data acceptability: (1) Access

resistance  $\leq 10 \text{ M}\Omega$ . (2) Membrane resistance  $\geq 500 \text{ M}\Omega$ . (3) No apparent rundown for peak current.

Within each cellular recording, the current responses to test compound addition were normalized to the vehicle control ( $I_{\text{compound}} / I_{\text{vehicle control}}$ ) and the ratios of inhibition were calculated as following equation:

$$\% \text{ inhibition} = 1 - (\text{current response} / \text{maximal control tail current}) \times 100 \%$$

S 20

**Table 2.** Binding affinities for the additional receptors and ion channels of compound

54

| Receptor / Ion Channel    | % Inhibition* |
|---------------------------|---------------|
| 5-HT <sub>1A</sub>        | 30.81± 4.1    |
| 5-HT <sub>2A</sub>        | 51.47± 3.8    |
| 5-HT transporter          | 45.34± 0.4    |
| Noradrenaline transporter | 31.89± 0.4    |
| H <sub>1</sub>            | 11.91± 1.4    |
| H <sub>3</sub>            | 35.65± 3.2    |
| $\alpha_1$                | 15.28± 1.2    |
| $\alpha_2$                | 10.56± 0.9    |
| NMDA                      | 27.68± 2.1    |
| $\mu$ -opioid             | 25.29± 2.4    |
| CB <sub>1</sub>           | 19.28± 2.4    |
| CB <sub>2</sub>           | 38.56± 1.9    |
| Nav <sub>1.7</sub>        | 24.56± 1.2    |
| TRPV-1                    | 23.34 ± 1.9   |

Note: \*, % inhibition was determined at the concentration of 1  $\mu\text{M}$ .

**The data of compound 54 in Phase I (0-15 min) of the mice formalin test**

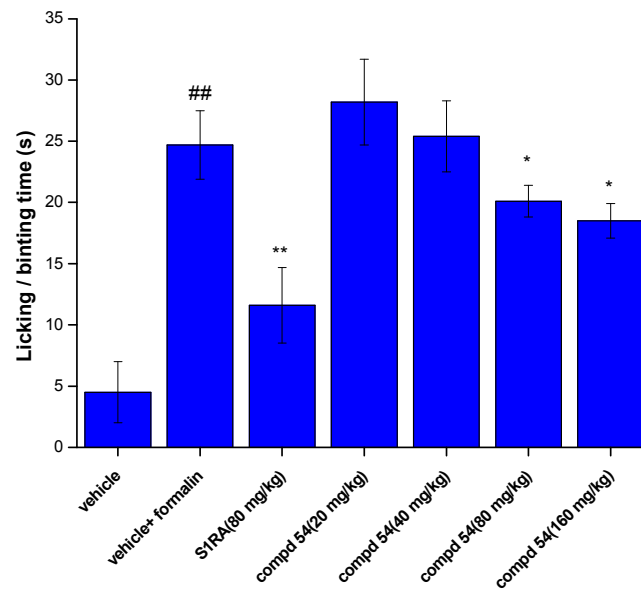

**Figure 4.** Anti-allodynic effect of S1RA and compound **54** in phase I (0–15 min) of the mice formalin test. Each column and vertical line represents mean  $\pm$ SEM of the values obtained in at least 10 animals. Statistically significant differences: #  $p < 0.05$ , ##  $p < 0.01$  vs vehicle; \*  $p < 0.05$ , \*\*  $p < 0.01$  vs vehicle +formalin (Two-Way ANOVA followed by Newman–Keuls test)

# <sup>1</sup>H NMR of compound 54

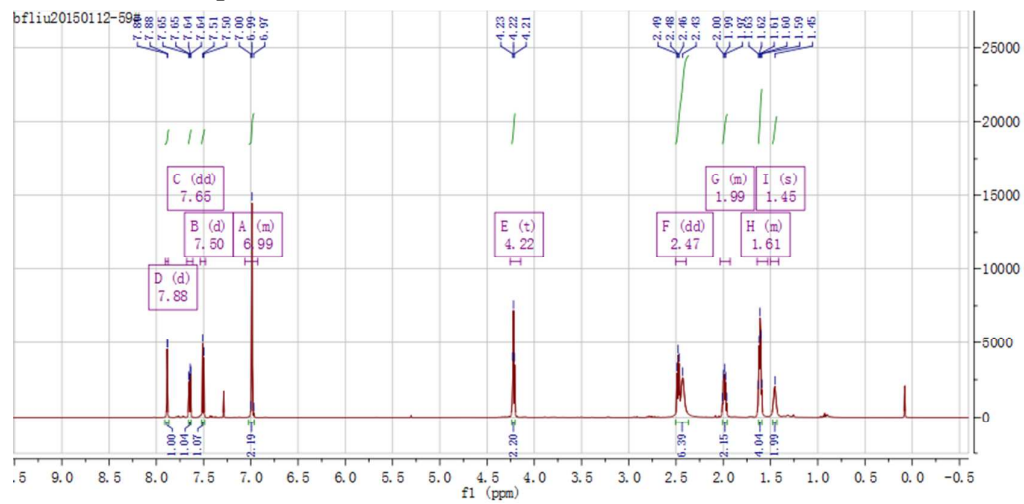

# HRMS analysis of compounds 54

Xevo G2 Q-TOF/YCA166#

chaoxudong 13 (0.250) Cm (11:16-(1.5\*26.53))

13-Apr-2015

Waters  
1: TOF MS ES+  
2.80e7

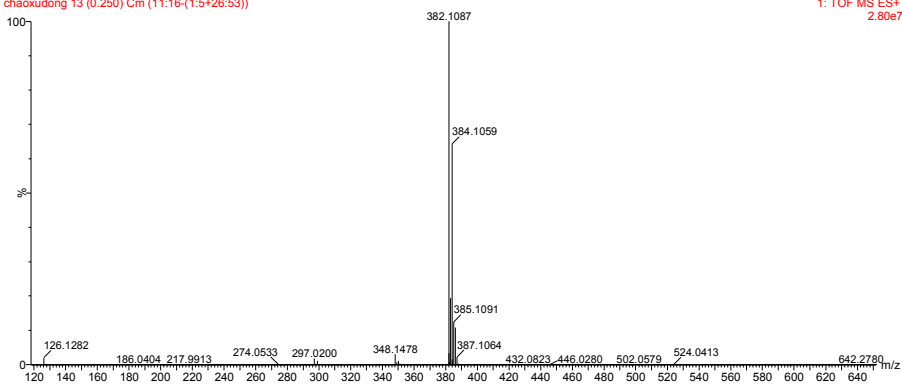



## HPLC analysis of compounds 54

SHIMADZU  
LabSolutions 分析报告

### <样品信息>

样品名 : 新药曹旭东s201401201-21\_约1mg每ml  
 样品ID :  
 数据文件名 : 新药曹旭东s201401201-1\_约1mg每ml (中性稀释剂)  
 方法文件名 : s201401201-1方法.lcm  
 批处理文件名 : 20150212日曹旭东s20141201-1纯度检查.lcb  
 样品瓶号 : 1-95 样品类型 : 未知  
 进样体积 : 5 uL  
 分析日期 : 2015/2/12 14:24:43 分析者 : wgh  
 处理日期 : 2015/2/13 14:50:30 处理者 : wgh

### <色谱图>

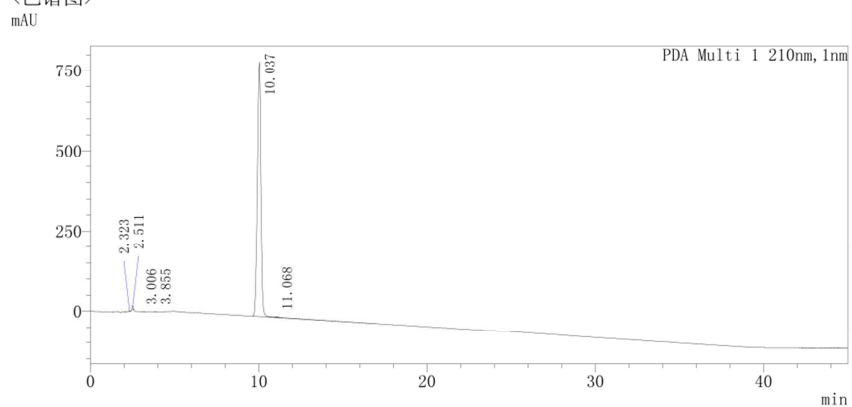

### <峰表>

PDA Ch1 210nm

| 峰号 | 保留时间   | 面积       | 面积%     | 高度     | 浓度     | 化合物名 |
|----|--------|----------|---------|--------|--------|------|
| 1  | 2.323  | 12033    | 0.102   | 2344   | 0.102  |      |
| 2  | 2.511  | 40626    | 0.346   | 9430   | 0.346  |      |
| 3  | 3.006  | 2883     | 0.025   | 266    | 0.025  |      |
| 4  | 3.855  | 4583     | 0.039   | 378    | 0.039  |      |
| 5  | 10.037 | 11669750 | 99.316  | 783696 | 99.316 |      |
| 6  | 11.068 | 20193    | 0.172   | 1620   | 0.172  |      |
| 总计 |        | 11750067 | 100.000 | 797734 |        |      |

### X-Ray Crystal Data of Compound 54

The single-crystal growth was carried out in co-solvent of methanol and acetone at room temperature.

**Table 3** Crystal data and structure refinement for SF20150715\_ZYC\_0m.

|                                   |                                                                               |
|-----------------------------------|-------------------------------------------------------------------------------|
| Identification code               | sf20150715_zyc_0m                                                             |
| Empirical formula                 | C <sub>18</sub> H <sub>26</sub> Cl <sub>3</sub> N <sub>3</sub> O <sub>4</sub> |
| Formula weight                    | 454.77                                                                        |
| Temperature                       | 296 K                                                                         |
| Wavelength                        | 0.71073 Å                                                                     |
| Crystal system                    | Triclinic                                                                     |
| Space group                       | P -1                                                                          |
| Unit cell dimensions              | a = 8.7813(3) Å      □ =                                                      |
| 97.6772(14)°.                     | b = 10.4026(3) Å      □ =                                                     |
| 91.8626(13)°.                     | c = 12.2094(4) Å      □ =                                                     |
| 05.0210(12)°.                     |                                                                               |
| Volume                            | 1064.92(6) Å <sup>3</sup>                                                     |
| Z                                 | 2                                                                             |
| Density (calculated)              | 1.418 Mg/m <sup>3</sup>                                                       |
| Absorption coefficient            | 0.459 mm <sup>-1</sup>                                                        |
| F(000)                            | 476                                                                           |
| Crystal size                      | 0.39 x 0.32 x 0.3 mm <sup>3</sup>                                             |
| Theta range for data collection   | 1.687 to 27.519°.                                                             |
| Index ranges                      | -11 ≤ h ≤ 11, -13 ≤ k ≤ 13, -15 ≤ l ≤ 15                                      |
| Reflections collected             | 17671                                                                         |
| Independent reflections           | 4873 [R(int) = 0.0167]                                                        |
| Completeness to theta = 26.000°   | 99.8 %                                                                        |
| Absorption correction             | Semi-empirical from equivalents                                               |
| Max. and min. transmission        | 0.7456 and 0.1631                                                             |
| Refinement method                 | Full-matrix least-squares on F <sup>2</sup>                                   |
| Data / restraints / parameters    | 4873 / 0 / 259                                                                |
| Goodness-of-fit on F <sup>2</sup> | 1.028                                                                         |
| Final R indices [I > 2σ(I)]       | R1 = 0.0364, wR2 = 0.1002                                                     |

|                             |                                    |
|-----------------------------|------------------------------------|
| R indices (all data)        | $R1 = 0.0427, wR2 = 0.1063$        |
| Extinction coefficient      | n/a                                |
| Largest diff. peak and hole | 0.337 and -0.289 e.Å <sup>-3</sup> |

**Table 4** Atomic coordinates ( $\times 10^4$ ) and equivalent isotropic displacement parameters ( $\text{\AA}^2 \times 10^3$ ) for SF20150715\_ZYC\_0m. U(eq) is defined as one third of the trace of the orthogonalized  $U^{ij}$  tensor.

|       | x        | y        | z        | U(eq) |
|-------|----------|----------|----------|-------|
| Cl(1) | 10352(1) | 13549(1) | 3906(1)  | 66(1) |
| Cl(2) | 10824(1) | 12834(1) | 6299(1)  | 67(1) |
| O(1)  | 7142(2)  | 8759(1)  | 7020(1)  | 58(1) |
| O(2)  | 3147(1)  | 6056(1)  | 3607(1)  | 51(1) |
| N(1)  | 6205(2)  | 8556(1)  | 5206(1)  | 38(1) |
| N(2)  | 5174(2)  | 7851(1)  | 4320(1)  | 42(1) |
| N(3)  | 2260(1)  | 3538(1)  | 374(1)   | 35(1) |
| C(1)  | 6196(2)  | 8137(2)  | 6238(1)  | 42(1) |
| C(2)  | 4977(2)  | 6925(2)  | 6341(1)  | 48(1) |
| C(3)  | 3982(2)  | 6242(2)  | 5490(1)  | 48(1) |
| C(4)  | 4148(2)  | 6763(2)  | 4466(1)  | 42(1) |
| C(5)  | 3232(2)  | 6637(2)  | 2592(1)  | 50(1) |
| C(6)  | 2209(2)  | 5588(2)  | 1702(1)  | 45(1) |
| C(7)  | 2869(2)  | 4377(2)  | 1471(1)  | 44(1) |
| C(8)  | 552(2)   | 2803(2)  | 340(1)   | 47(1) |
| C(9)  | 2(2)     | 2027(2)  | -810(2)  | 56(1) |
| C(10) | 986(2)   | 1062(2)  | -1175(2) | 57(1) |
| C(11) | 2713(2)  | 1821(2)  | -1099(2) | 54(1) |
| C(12) | 3246(2)  | 2585(2)  | 47(2)    | 52(1) |
| C(13) | 7243(2)  | 9772(1)  | 4925(1)  | 37(1) |
| C(14) | 7018(2)  | 10111(2) | 3874(1)  | 46(1) |
| C(15) | 7990(2)  | 11259(2) | 3570(1)  | 51(1) |
| C(16) | 9173(2)  | 12104(2) | 4301(1)  | 44(1) |
| C(17) | 9383(2)  | 11780(2) | 5345(1)  | 43(1) |
| C(18) | 8441(2)  | 10613(2) | 5666(1)  | 44(1) |
| O(3)  | 3248(2)  | -1468(2) | -781(2)  | 73(1) |
| O(4)  | 4179(2)  | -316(2)  | 1428(1)  | 77(1) |
| Cl(3) | -2721(1) | 4590(1)  | 1410(1)  | 51(1) |

**Table 5** Bond lengths [Å] and angles [°] for SF20150715\_ZYC\_0m.

---

|              |            |
|--------------|------------|
| Cl(1)-C(16)  | 1.7269(16) |
| Cl(2)-C(17)  | 1.7330(15) |
| O(1)-C(1)    | 1.2346(19) |
| O(2)-C(4)    | 1.3462(18) |
| O(2)-C(5)    | 1.4454(19) |
| N(1)-N(2)    | 1.3805(16) |
| N(1)-C(1)    | 1.3879(19) |
| N(1)-C(13)   | 1.4442(18) |
| N(2)-C(4)    | 1.2883(19) |
| N(3)-H(3)    | 0.9800     |
| N(3)-C(7)    | 1.4972(19) |
| N(3)-C(8)    | 1.4930(18) |
| N(3)-C(12)   | 1.5006(19) |
| C(1)-C(2)    | 1.451(2)   |
| C(2)-H(2)    | 0.9300     |
| C(2)-C(3)    | 1.330(2)   |
| C(3)-H(3A)   | 0.9300     |
| C(3)-C(4)    | 1.425(2)   |
| C(5)-H(5A)   | 0.9700     |
| C(5)-H(5B)   | 0.9700     |
| C(5)-C(6)    | 1.513(2)   |
| C(6)-H(6A)   | 0.9700     |
| C(6)-H(6B)   | 0.9700     |
| C(6)-C(7)    | 1.515(2)   |
| C(7)-H(7A)   | 0.9700     |
| C(7)-H(7B)   | 0.9700     |
| C(8)-H(8A)   | 0.9700     |
| C(8)-H(8B)   | 0.9700     |
| C(8)-C(9)    | 1.519(2)   |
| C(9)-H(9A)   | 0.9700     |
| C(9)-H(9B)   | 0.9700     |
| C(9)-C(10)   | 1.519(3)   |
| C(10)-H(10A) | 0.9700     |
| C(10)-H(10B) | 0.9700     |
| C(10)-C(11)  | 1.511(3)   |
| C(11)-H(11A) | 0.9700     |

|              |          |
|--------------|----------|
| C(11)-H(11B) | 0.9700   |
| C(11)-C(12)  | 1.509(2) |
| C(12)-H(12A) | 0.9700   |
| C(12)-H(12B) | 0.9700   |
| C(13)-C(14)  | 1.397(2) |
| C(13)-C(18)  | 1.393(2) |
| C(14)-H(14)  | 0.9300   |
| C(14)-C(15)  | 1.379(2) |
| C(15)-H(15)  | 0.9300   |
| C(15)-C(16)  | 1.380(2) |
| C(16)-C(17)  | 1.380(2) |
| C(17)-C(18)  | 1.393(2) |
| C(18)-H(18)  | 0.9300   |
| O(3)-H(3B)   | 0.8500   |
| O(3)-H(3C)   | 0.8500   |
| O(4)-H(4A)   | 0.8500   |
| O(4)-H(4B)   | 0.8501   |

|                 |            |
|-----------------|------------|
| C(4)-O(2)-C(5)  | 116.61(12) |
| N(2)-N(1)-C(1)  | 122.96(12) |
| N(2)-N(1)-C(13) | 111.85(11) |
| C(1)-N(1)-C(13) | 125.18(12) |
| C(4)-N(2)-N(1)  | 118.36(12) |
| C(7)-N(3)-H(3)  | 107.2      |
| C(7)-N(3)-C(12) | 110.91(12) |
| C(8)-N(3)-H(3)  | 107.2      |
| C(8)-N(3)-C(7)  | 112.95(12) |
| C(8)-N(3)-C(12) | 110.97(12) |
| C(12)-N(3)-H(3) | 107.2      |
| O(1)-C(1)-N(1)  | 122.59(15) |
| O(1)-C(1)-C(2)  | 122.23(14) |
| N(1)-C(1)-C(2)  | 115.17(13) |
| C(1)-C(2)-H(2)  | 119.0      |
| C(3)-C(2)-C(1)  | 122.02(15) |
| C(3)-C(2)-H(2)  | 119.0      |
| C(2)-C(3)-H(3A) | 121.5      |
| C(2)-C(3)-C(4)  | 117.05(15) |
| C(4)-C(3)-H(3A) | 121.5      |

|                     |            |
|---------------------|------------|
| O(2)-C(4)-C(3)      | 116.56(13) |
| N(2)-C(4)-O(2)      | 119.05(13) |
| N(2)-C(4)-C(3)      | 124.39(14) |
| O(2)-C(5)-H(5A)     | 110.2      |
| O(2)-C(5)-H(5B)     | 110.2      |
| O(2)-C(5)-C(6)      | 107.44(13) |
| H(5A)-C(5)-H(5B)    | 108.5      |
| C(6)-C(5)-H(5A)     | 110.2      |
| C(6)-C(5)-H(5B)     | 110.2      |
| C(5)-C(6)-H(6A)     | 109.5      |
| C(5)-C(6)-H(6B)     | 109.5      |
| C(5)-C(6)-C(7)      | 110.94(14) |
| H(6A)-C(6)-H(6B)    | 108.0      |
| C(7)-C(6)-H(6A)     | 109.5      |
| C(7)-C(6)-H(6B)     | 109.5      |
| N(3)-C(7)-C(6)      | 112.98(12) |
| N(3)-C(7)-H(7A)     | 109.0      |
| N(3)-C(7)-H(7B)     | 109.0      |
| C(6)-C(7)-H(7A)     | 109.0      |
| C(6)-C(7)-H(7B)     | 109.0      |
| H(7A)-C(7)-H(7B)    | 107.8      |
| N(3)-C(8)-H(8A)     | 109.7      |
| N(3)-C(8)-H(8B)     | 109.7      |
| N(3)-C(8)-C(9)      | 109.93(13) |
| H(8A)-C(8)-H(8B)    | 108.2      |
| C(9)-C(8)-H(8A)     | 109.7      |
| C(9)-C(8)-H(8B)     | 109.7      |
| C(8)-C(9)-H(9A)     | 109.2      |
| C(8)-C(9)-H(9B)     | 109.2      |
| H(9A)-C(9)-H(9B)    | 107.9      |
| C(10)-C(9)-C(8)     | 112.12(16) |
| C(10)-C(9)-H(9A)    | 109.2      |
| C(10)-C(9)-H(9B)    | 109.2      |
| C(9)-C(10)-H(10A)   | 109.7      |
| C(9)-C(10)-H(10B)   | 109.7      |
| H(10A)-C(10)-H(10B) | 108.2      |
| C(11)-C(10)-C(9)    | 109.69(14) |
| C(11)-C(10)-H(10A)  | 109.7      |

|                     |            |
|---------------------|------------|
| C(11)-C(10)-H(10B)  | 109.7      |
| C(10)-C(11)-H(11A)  | 109.4      |
| C(10)-C(11)-H(11B)  | 109.4      |
| H(11A)-C(11)-H(11B) | 108.0      |
| C(12)-C(11)-C(10)   | 111.35(15) |
| C(12)-C(11)-H(11A)  | 109.4      |
| C(12)-C(11)-H(11B)  | 109.4      |
| N(3)-C(12)-C(11)    | 110.82(13) |
| N(3)-C(12)-H(12A)   | 109.5      |
| N(3)-C(12)-H(12B)   | 109.5      |
| C(11)-C(12)-H(12A)  | 109.5      |
| C(11)-C(12)-H(12B)  | 109.5      |
| H(12A)-C(12)-H(12B) | 108.1      |
| C(14)-C(13)-N(1)    | 118.28(13) |
| C(18)-C(13)-N(1)    | 122.34(13) |
| C(18)-C(13)-C(14)   | 119.37(14) |
| C(13)-C(14)-H(14)   | 119.9      |
| C(15)-C(14)-C(13)   | 120.15(14) |
| C(15)-C(14)-H(14)   | 119.9      |
| C(14)-C(15)-H(15)   | 119.5      |
| C(14)-C(15)-C(16)   | 120.92(15) |
| C(16)-C(15)-H(15)   | 119.5      |
| C(15)-C(16)-Cl(1)   | 119.92(13) |
| C(17)-C(16)-Cl(1)   | 121.07(12) |
| C(17)-C(16)-C(15)   | 119.00(15) |
| C(16)-C(17)-Cl(2)   | 120.45(12) |
| C(16)-C(17)-C(18)   | 121.30(14) |
| C(18)-C(17)-Cl(2)   | 118.24(12) |
| C(13)-C(18)-H(18)   | 120.4      |
| C(17)-C(18)-C(13)   | 119.23(14) |
| C(17)-C(18)-H(18)   | 120.4      |
| H(3B)-O(3)-H(3C)    | 109.5      |
| H(4A)-O(4)-H(4B)    | 109.5      |

---



## References:

- (1) Chen, Y.; Wang, S. L.; Xu, X. Q.; Xin, L.; Yu, M. Q.; Zhao, S.; Liu, S. C.; Qiu, Y. L.; Zhang, T.; Liu, B-F.; Zhang, G. S. Synthesis and Biological Investigation of Coumarin Piperazine (Piperidine) Derivatives as Potential Multireceptor Atypical Antipsychotics. *J. Med. Chem.* **2013**, *56*, 4671-4690.
- (2) Wang, S. L.; Chen, Y.; Liu, X. H.; Xu, X. Q.; Xin, L.; Liu, B-F.; Zhang, G. S. Synthesis and Evaluation of Novel 2,3-Dihydrobenzo[b][1,4]-dioxin- and Indolealkylamine Derivatives as Potential Antidepressants. *Arch. Pharm. Chem. Life Sci.* **2014**, *347*, 32-41.
- (3) Fabrizio M.; Paolo C.; Daniele, A.; Roberto. A.; Roberto B.; Barbara B.; Michela B.; Letizia B.; Giorgio B.; Simone B.; Renzo, C.; Anna C.; Mauro, C.; Elettra F.; Stefano F.; Carla M.; Emilio, M-P.; Michele, N.; Beatrice, O.; Emiliangelo, R.; Kevin, D. R.; Maja, R.; Ilaria S.; Simone, S.; Giovanna T.; Luca T.; Silvia T.; Filippo V.; Alessandro Z.; Laura Z.; Romano, D. F.  
6-(3,4-Dichlorophenyl)-1-[(Methoxy)methyl]-3-azabicyclo[4.1.0]heptane: A New Potent and Selective Triple Reuptake Inhibitor. *J. Med. Chem.* **2010**, *53*, 4989–5001.
- (4) Fabrizio M.; Paolo C.; Roberto. A.; Roberto B.; Barbara B.; Michela B.; Letizia B.; Giorgio B.; Simone B.; Anna C.; Silvia D.; Romano D. F.; Elettra F.; Stefano F.; Carla M.; Doug M.; Michele N.; Beatrice O.; Kevin D. R.; Ilaria S.; Giovanna T.; Luca T.; Silvia T.; Filippo V.; Alessandro Z.; Laura Z.  
1-(Aryl)-6-[alkoxyalkyl]-3-azabicyclo[3.1.0]hexanes and  
6-(Aryl)-6-[alkoxyalkyl]-3-azabicyclo[3.1.0]hexanes: A New Series of Potent and Selective Triple Reuptake Inhibitors. *J. Med. Chem.* **2010**, *53*, 2534-2551.
- (5) Marlon, C.; Gin, H.; Lawrence, A. B.; Zhan, C. C.; Erica, J. G.; Madhavi, P.; Marina, S.; Arlene, M.; Tracy, C.; Jill, W.; Anthony, L.; Gilbert, D.; Tiffany, G.; Jorge, D. B. Pharmacological characterization of A-960656, a histamine H<sub>3</sub> receptor antagonist with efficacy in animal models of osteoarthritis and neuropathic pain. *Eur. J. Pharm.* **2012**, *684*, 87-94.
- (6) Hans-Peter, B.; Carsten, D. S., Ralf, Steinmetz, Ina, F.; Michael, L. B.; Rudolf, G.; Joachim, L.; Michael, K.; Dieter, S.; Christian, R. N. Synthesis of

Thieno[2,3-b]Pyridinones Acting as Cytoprotectants and as Inhibitors of [<sup>3</sup>H]Glycine Binding to the N-Methyl-D-aspartate (NMDA) Receptor. *J. Med. Chem.* **2006**, *49*, 864-871.

(7) Chen, Y.; Wang, G.; Xu, X. Q.; Liu, B-F.; Li, J. Q.; Zhang, G. S. Design, Synthesis and Biological Activity Evaluation of Arylpiperazine Derivatives for the Treatment of Neuropathic Pain. *Molecules*, **2011**, *16*, 5785-5806.

(8) Jennifer, M. F.; Michael, J. D.; Karin, R. T.; Tiffany, R. G.; George, K. G.; Anthony V. D.; Odile, F. E-k.; Betty, B. Y.; Gin, C. H.; Madhavi, P.; Chang, Z. Z.; Prasant C.; Michael, D. M. Indol-3-ylcycloalkyl Ketones: Effects of N1 Substituted Indole Side Chain Variations on CB<sub>2</sub> Cannabinoid Receptor Activity. *J. Med. Chem.* **2010**, *53*, 295-315.

(9) Ornelio, R.; Fedierica, M.; Azzurra, P.; Massimo, C.; Vanessa, P.; Jurg, G.; Andrea, C. One-pot Heterogeneous Synthesis of I3-Tetrahydrocannabinol Analogues and Xanthenes Showing Differential Binding to CB<sub>1</sub> and CB<sub>2</sub> Receptors. *Eur. J. Med. Chem.* **2014**, *85*, 77-86.

(10) Macsari, I.; Besidski, Y.; Csajernyik, G.; Nilsson, L. I.; Sandberg, L.; Yngve, U.; Ahlin, K.; Bueters, T.; Eriksson, A. B.; Lund, P. E.; Venyike, E.; Oerther, S.; Hygge Blakeman, K.; Luo, L.; Arvidsson, P. I. 3-Oxoisoindoline-1-carboxamides: Potent, State-Dependent Blockers of Voltage-Gated Sodium Channel Nav 1.7 with Efficacy in Rat Pain Models. *J. Med. Chem.* **2012**, *55*, 6866-6880.

(11) Quintanar-Audelo, M.; Fernandez-Carvajal, A.; Van Den Nest, W.; Carreno, C.; Ferrer-Montiel, A.; Albericio, F. Design and Synthesis of Indole-Based Peptoids as Potent Noncompetitive Antagonists of Transient Receptor Potential Vanilloid 1. *J. Med. Chem.* **2007**, *50*, 6133-6143.

(12) Vidal-Mosquera, M.; Fernandez-Carvajal, A.; Moure, A.; Valente, P.; Planells-Cases, R.; Gonzalez-Ros, J. M.; Bujons, J.; Ferrer-Montiel, A.; Messeguer, A. Triazine-Based Vanilloid 1 Receptor Open Channel Blockers: Design, Synthesis, Evaluation, and SAR Analysis. *J. Med. Chem.* **2011**, *54*, 7441-7452.
